# Supplementary material
Source: publisher figshare collection journal article supplement (https://sage.figshare.com/ndownloader/files/15367865)
Supplement: Supplementary file 1 [file 15367865]

Veterinary Pathology: Supplemental Materials.

Becker et al. Extra-intestinal Acanthocephalan *Oncicola venezuelensis* (Oligacanthorhynchidae) in Small Indian Mongooses (*Herpestes auropunctatus*) and African Green Monkeys (*Chlorocebus aethiops sabaeus*).

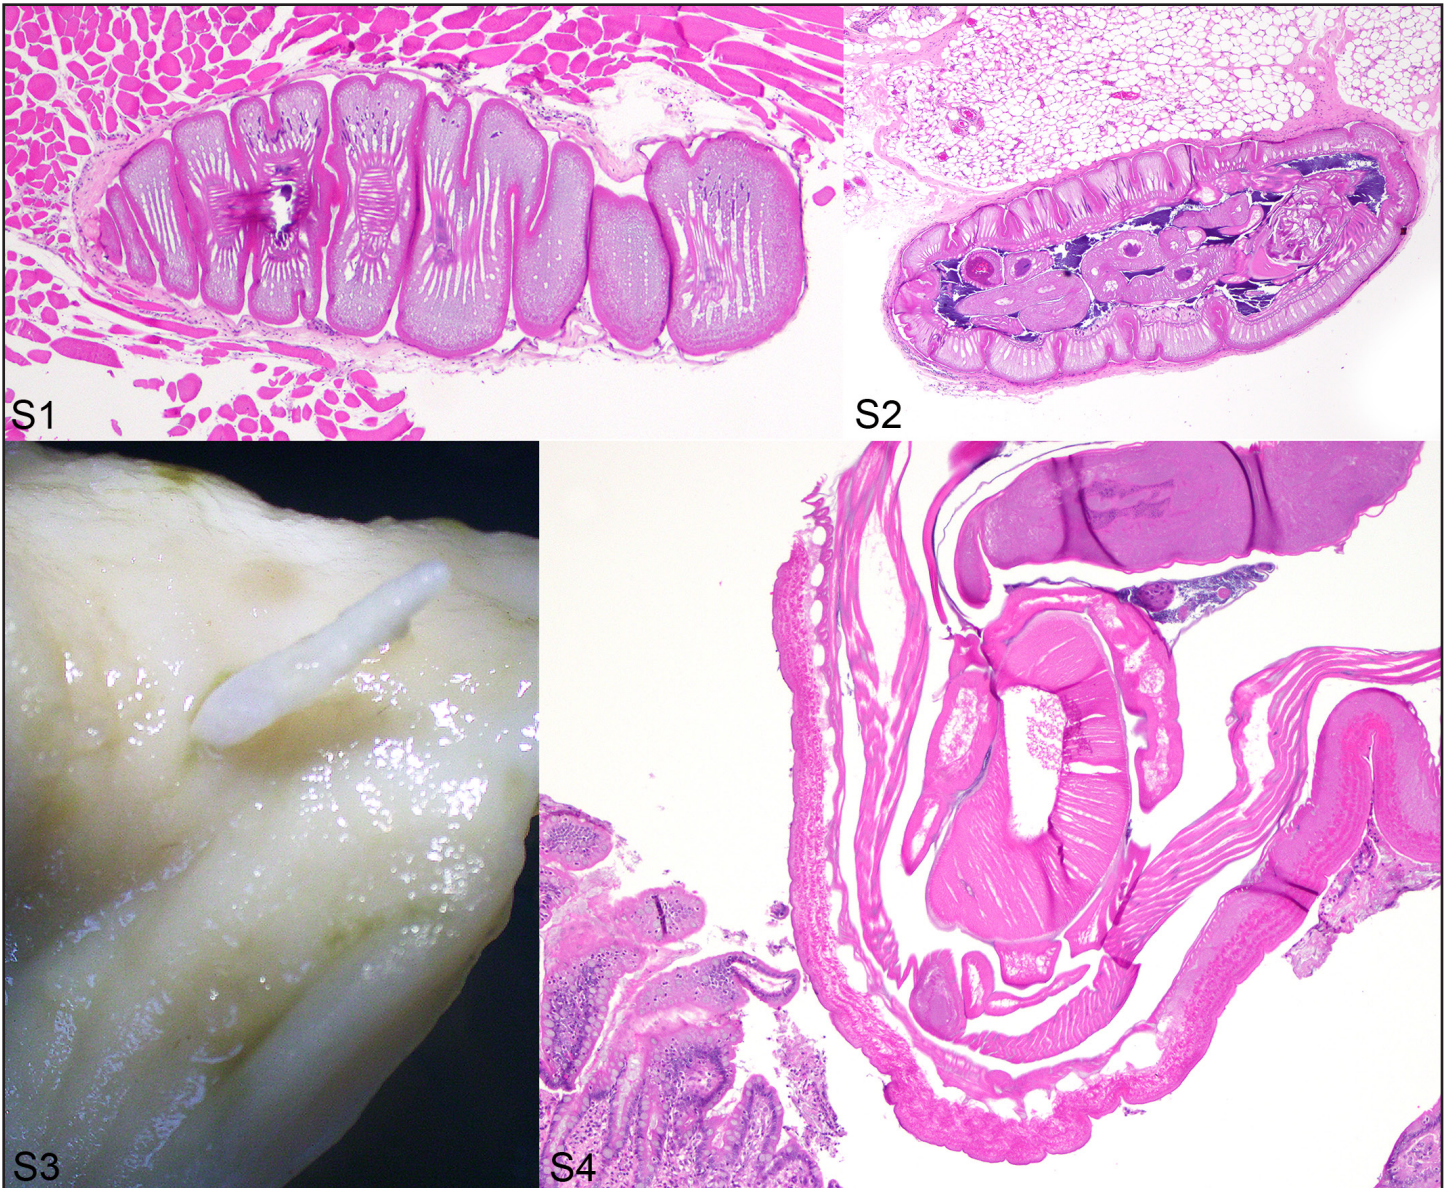

**Supplemental Figures S1-S2.** Cystacanths of *Oncicola venezuelensis*, African green monkey (case 5). S1. Intramuscular location (abdominal wall), minimal lymphoplasmacytic reaction, parasite in a pseudocyst, mild skeletal muscle degeneration and loss. S2. This cystacanth in a pseudocyst, abdominal wall, in an area of white adipose tissue, surrounded by a minimal inflammatory reaction.

**Supplemental Figures S3-S4.** Mature *O. venezuelensis* in a domestic cat, jejunum. S3. The parasite (approximately 7 mm. long), is attached to the jejunal mucosa S4. Histology of the parasite revealed presence of cuticle, thick hypodermal layer with lacunar channels, muscular layer and lack of digestive tract.
